# Supplementary material for: 1D/2D NiFeP/NiFe–OH heterostructure: roles of the unique nanostructure in stabilizing highly efficient oxygen evolution reaction
Source: Royal Society of Chemistry journal article supplement (doi:10.1039/d3ta03132b), 2023-01-01
Supplement: d3ta03132b2.pdf [file d3ta03132b2.pdf]

## Supporting Information

### **1D/2D NiFeP/NiFe-OH heterostructure: roles of the unique nanostructure in stabilizing highly efficient oxygen evolution reaction**

*Fuzhen Zhao,<sup>[a]</sup> Xin Zheng,<sup>[b]</sup> Xinyu Mao,<sup>[a]</sup> Huicong Liu,<sup>[a]</sup> Liqun Zhu,<sup>[a]</sup> Weiping Li,<sup>[a]</sup> Hui Ye,<sup>\*</sup> <sup>[c]</sup>Haining Chen<sup>\*,[a]</sup>*

[a] School of Materials Science and Engineering, Beihang University, No. 37 Xueyuan Road, Haidian District, Beijing 100191, China

[b] State Key Laboratory of Heavy Oil Processing, China University of Petroleum, Beijing 102249, China

[c] Aerospace Research Institute of Materials and Processing Technology, No. 1 South Dahongmen Road, Beijing 100076, China

### **Experimental section**

#### **Preparation of materials**

Ferrous Sulfate ( $\text{FeSO}_4 \cdot 7\text{H}_2\text{O}$ ), sodium citrate dihydrate ( $\text{Na}_3\text{C}_6\text{H}_5\text{O}_7 \cdot 2\text{H}_2\text{O}$ ), sodium sulfate ( $\text{Na}_2\text{SO}_4$ ), potassium hydroxide (KOH), boric acid ( $\text{H}_3\text{BO}_3$ ), potassium carbonate ( $\text{K}_2\text{CO}_3$ ), muriatic acid (HCl) and sulfuric acid ( $\text{H}_2\text{SO}_4$ ) were purchased from the Beijing Chemical Works (Beijing, China). Sodium hypophosphite ( $\text{NaH}_2\text{PO}_2$ ) were purchased from Innochem-Beijing. Nickel sulfate ( $\text{NiSO}_4 \cdot 6\text{H}_2\text{O}$ ) and sodium hydroxide (NaOH) were purchased from Shanghai Aladdin Bio-Chem Technology Co., LTD. Trisodium phosphate anhydrous ( $\text{Na}_3\text{PO}_4$ ) were purchased from Shanghai Macklin Biochemical Co., LTD. The nickel foam was purchased from the Tianyu factory of Shandong province.

#### **Preparation of clean Ni Foam**

The process include: (1) The Ni foam were washed and degreased in the solution containing  $10 \text{ g L}^{-1}$  NaOH,  $5 \text{ g L}^{-1}$   $\text{Na}_2\text{SO}_4$  and  $15 \text{ g L}^{-1}$   $\text{Na}_3\text{PO}_4$  for oil removal. (2) The oxide layer on the surface of the Ni foam was removed in the solution containing  $10 \text{ g L}^{-1}$  HCl and  $20 \text{ g L}^{-1}$   $\text{H}_2\text{SO}_4$ .

#### **Electrodeposition of single NiFe-OH**

A 50 ml electrolytic bath was used for electrodeposition at a temperature of  $25 \text{ }^\circ\text{C}$ . An aqueous nitrate solution with 0.1 M total metal ions ( $\text{Ni}^{2+}$  and  $\text{Fe}^{2+}$ ) served as the electrolyte. The substrate was treated to a cathodic deposition at  $20 \text{ mA cm}^{-2}$  for 600 s in a conventional synthesis.

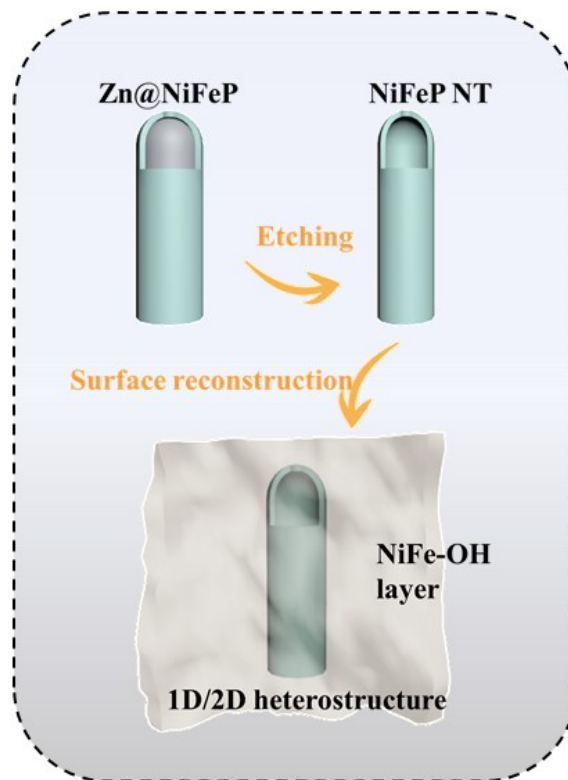

**Figure S1.** Schematic illustration of the synthesis processes.

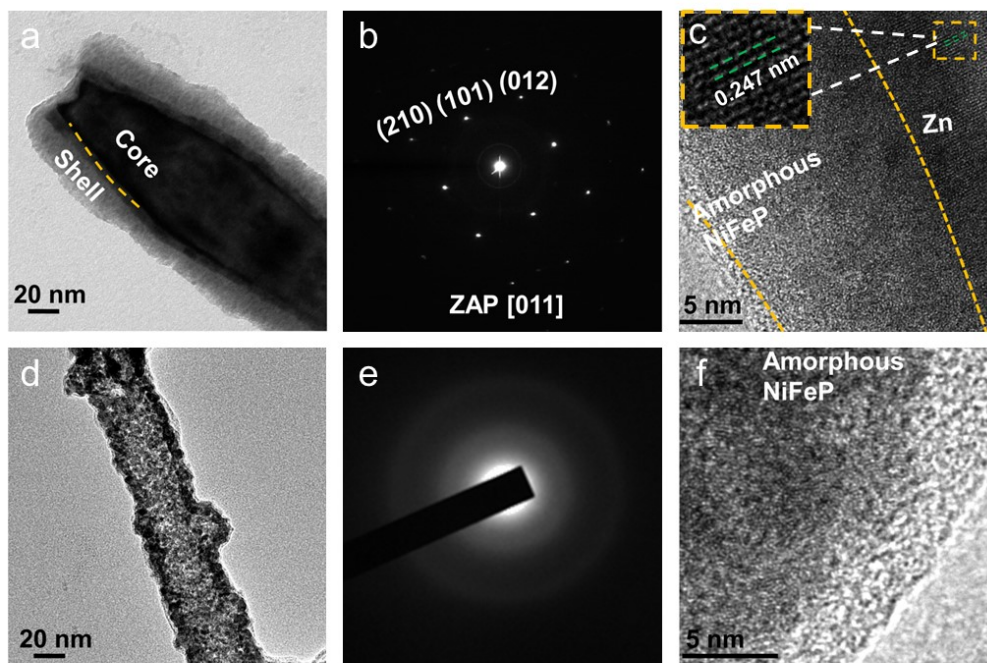

**Figure S2.** TEM results for the samples obtained at different steps. (a, d) TEM images, (b, e) SAED patterns, (c, f) HRTEM images of (a, b and c) Zn@NiFeP NWs and (d, e and f) 1D NTs.

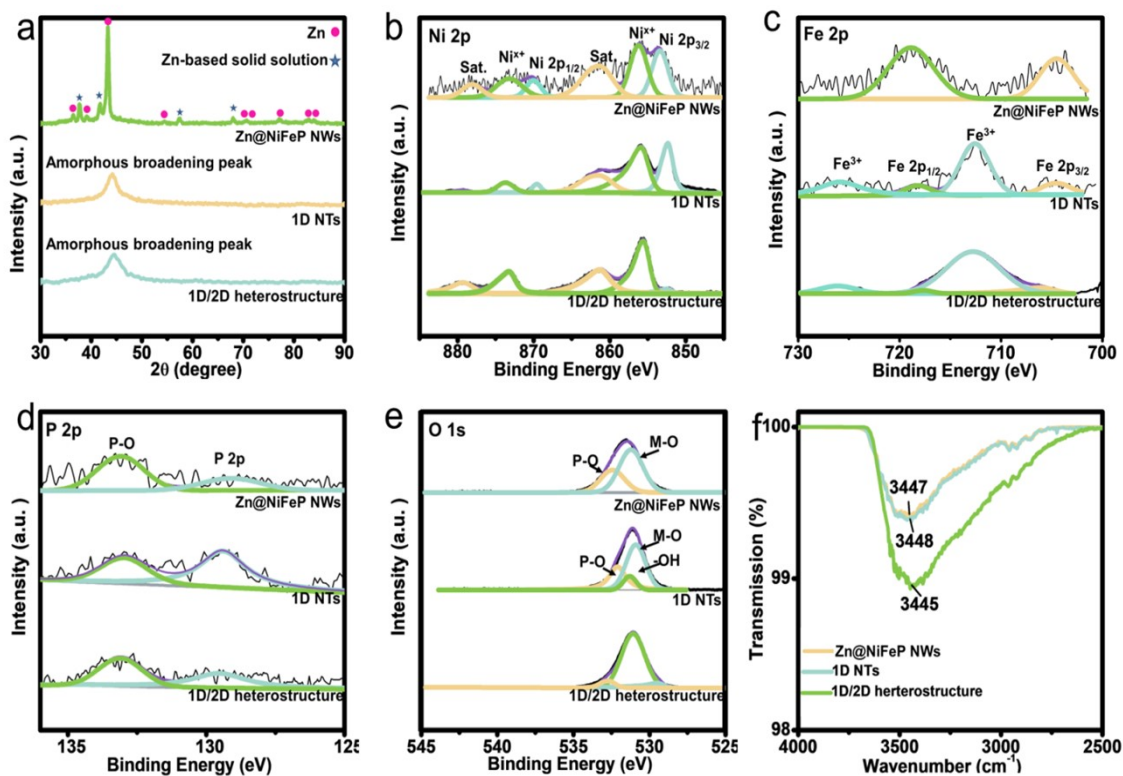

**Figure S3. Changes of structure and composition of the sample obtained at different steps.** (a) XRD patterns, (b) Ni 2p XPS spectra, (c) Fe 2p XPS spectra, (d) P 2p XPS spectra, (e) O 1s XPS spectra and (f) FTIR spectra of Zn@NiFeP NWs, 1D NTs and 1D/2D heterostructure.

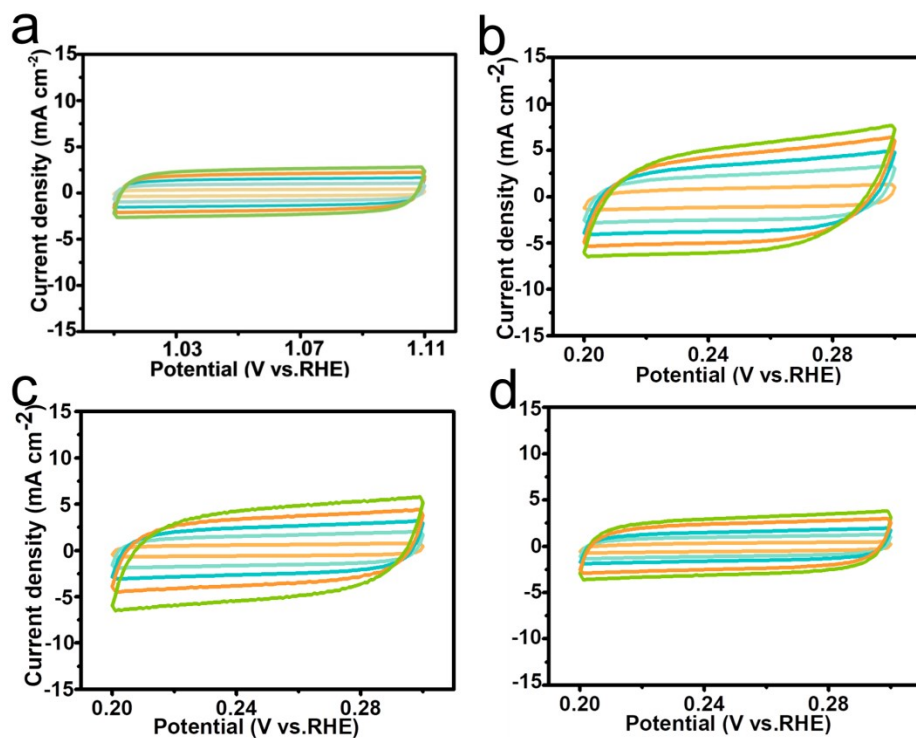

**Figure S4.** CV curves for ECSA measurements of IrO<sub>2</sub> and 1D/2D heterostructure with different Fe content. (a) IrO<sub>2</sub>. (b) Ni:Fe=96:4. (c) Ni:Fe=82:18. (d) Ni:Fe=64:36.

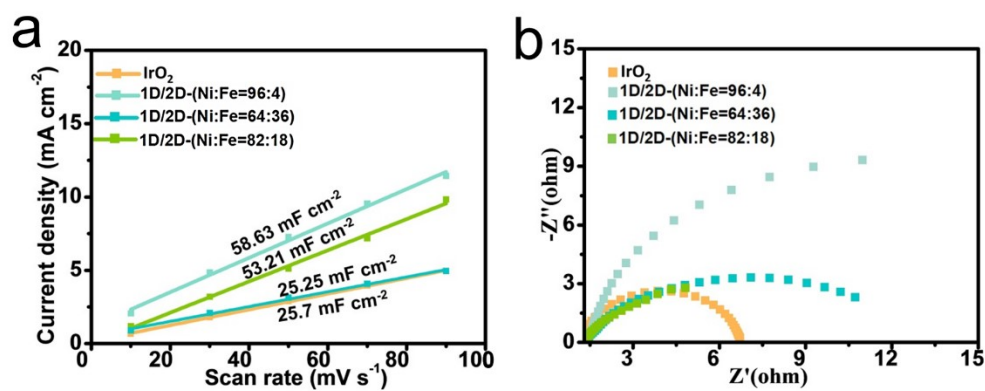

**Figure S5.** (a) Tafel plots of 1D/2D heterostructure with different Fe content. (b) EIS spectra of 1D/2D heterostructure with different Fe content

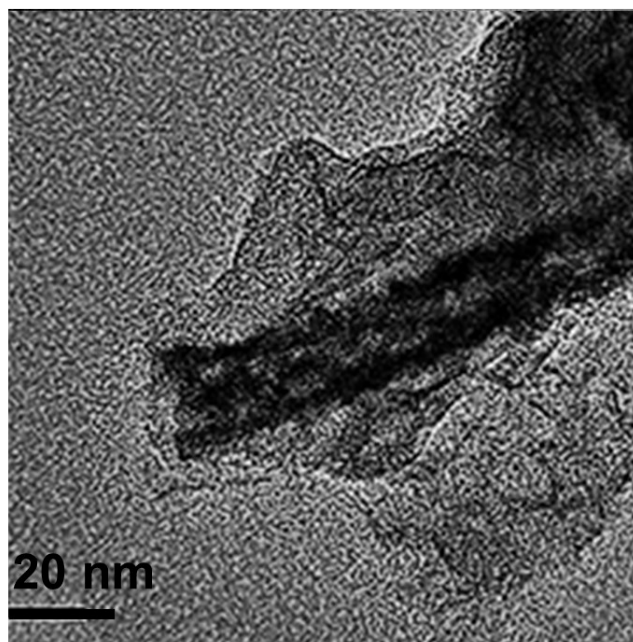

**Figure S6.** TEM image of 1D/2D heterostructure after 220 h OER measurement.

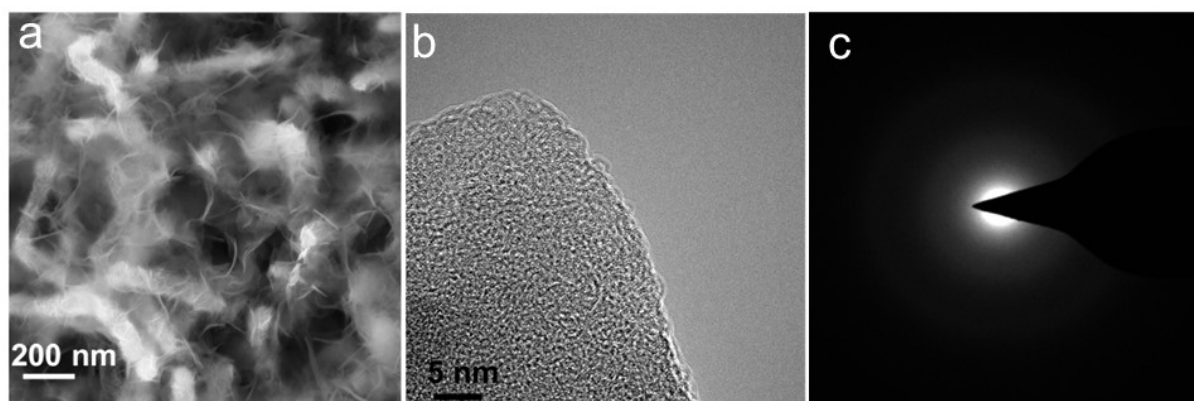

**Figure S7.** (a) SEM image, (b) HRTEM image and (c) SAED pattern of 1D/2D heterostructure after 220 h stability measurement.

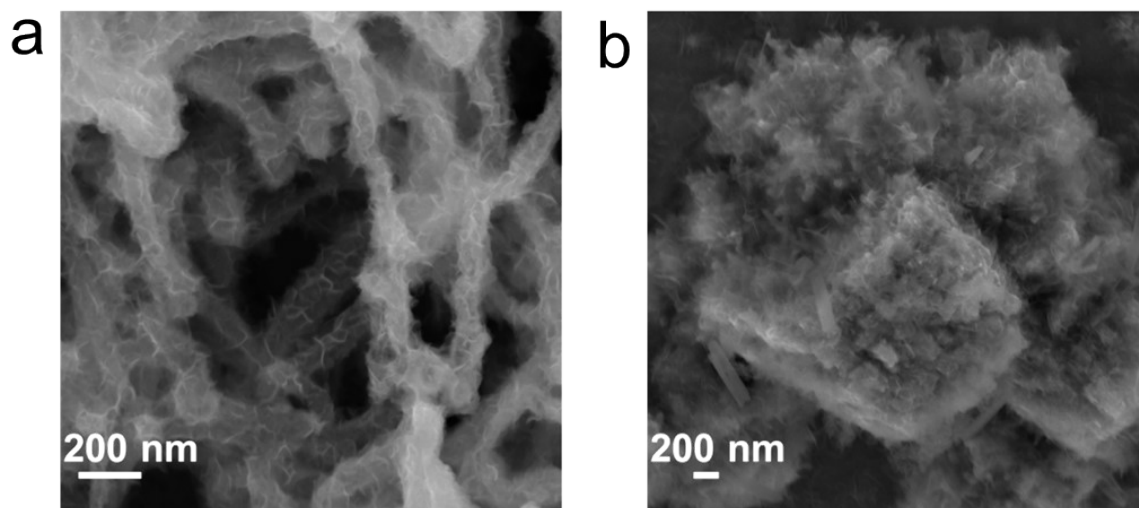

**Figure S8.** SEM images of sample with 4% Fe (a) and 36% Fe (b).

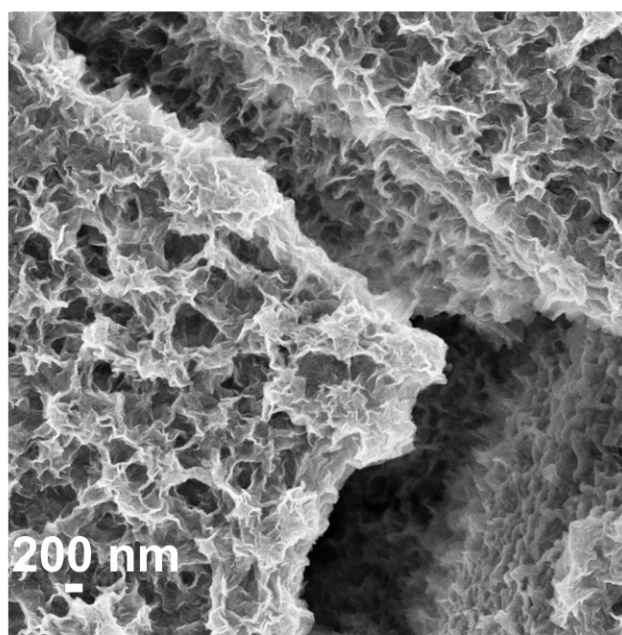

**Figure S9.** SEM image of measured single NiFe-OH.

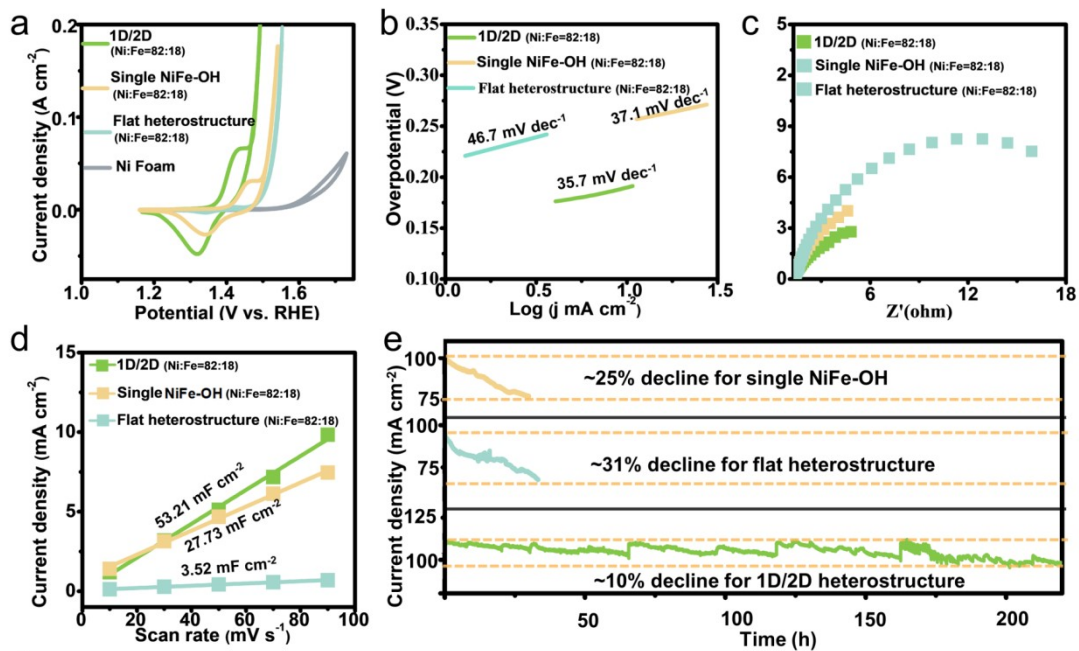

**Figure S10. Electrochemical measurements.** (a) CV curves, (b) Tafel slopes, (c) EIS spectra, (d) electrochemical double layer capacitance results for ECSA and (e) i-t curves of 1D/2D heterostructure, single NiFe-OH and flat heterostructure.

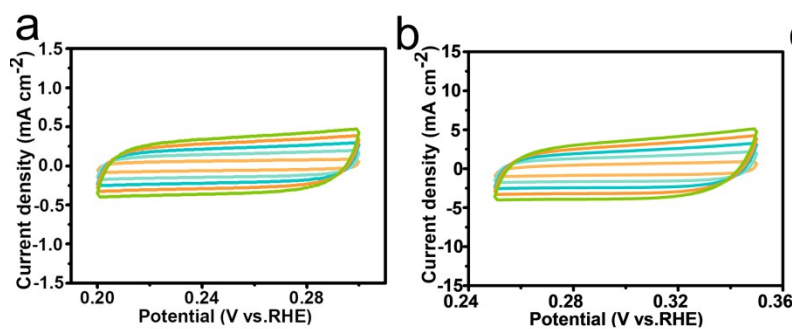

**Figure S11. CV curves for ECSA measurements of (a) flat heterostructure and (b) single NiFe-OH.**

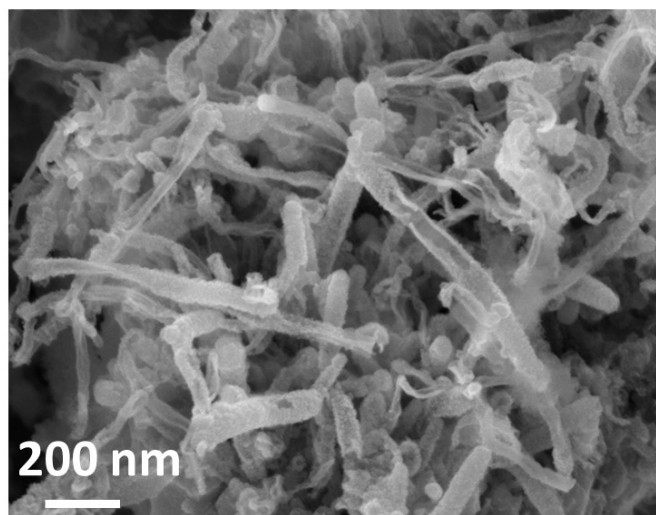

**Figure S12.** SEM image of measured 1D/2D heterostructure (220 h) after surface etching.

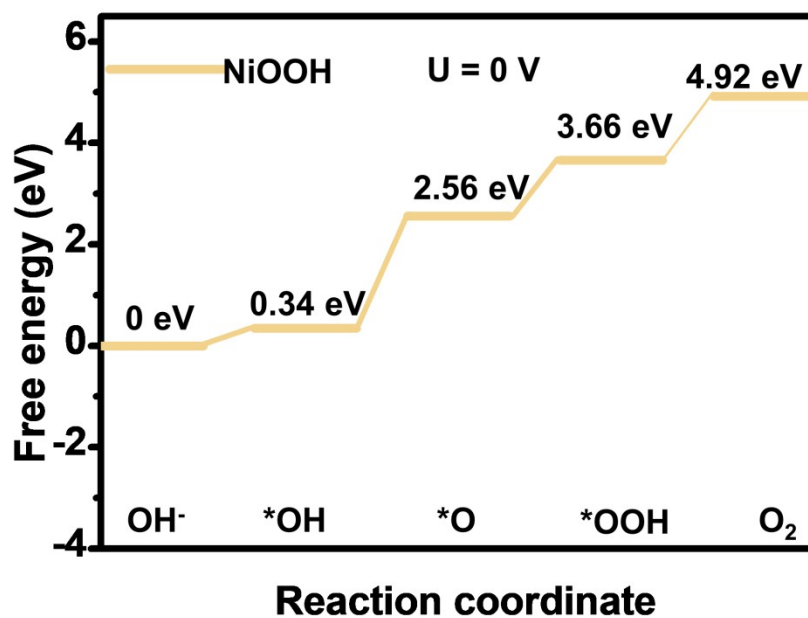

**Figure S13.** TEM image of 1D/2D heterostructure after 220 h OER measurement.



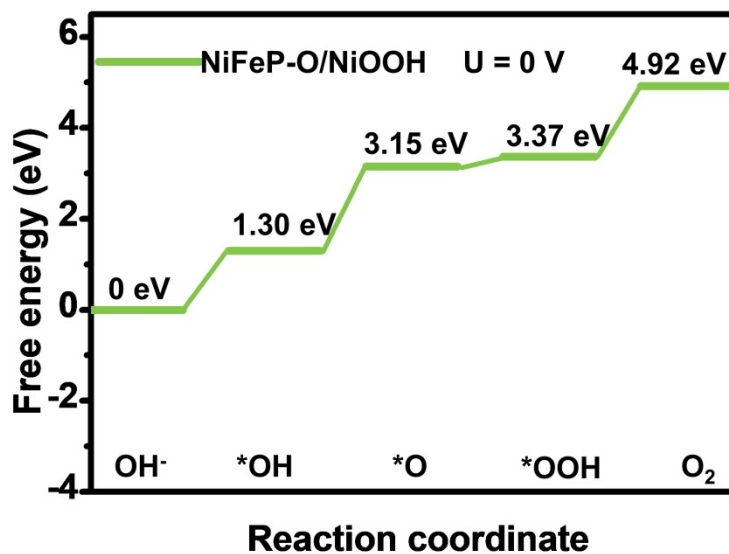

Figure S14. The calculated Gibbs free energy of NiFeP-O/NiOOH.

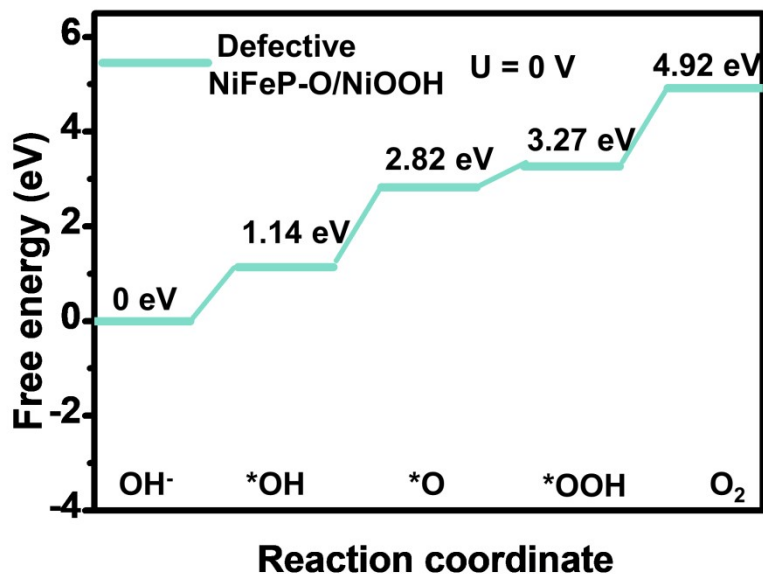

Figure S15. The calculated Gibbs free energy of defective NiFeP-O/NiOOH.

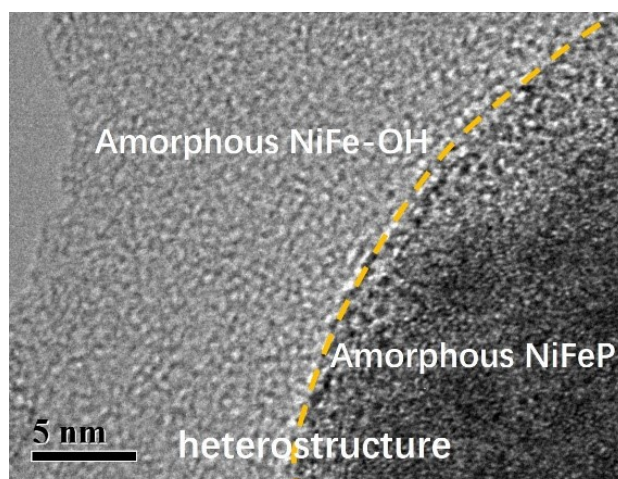

**Figure S16.** HRTEM image of 1D/2D heterostructure

**Table S1.** The results of EDS mapping

| <b>Zn@NiFeP NWs</b>   | <b>NiFeP NTs</b>      | <b>1D/2D<br/>heterostructure</b> | <b>1D/2D<br/>heterostructure<br/>after 220 h</b> | <b>1D/2D<br/>heterostructure<br/>(low content of Fe)</b> | <b>1D/2D<br/>heterostructure<br/>(low content of Fe)</b> |       |
|-----------------------|-----------------------|----------------------------------|--------------------------------------------------|----------------------------------------------------------|----------------------------------------------------------|-------|
| Atomic percent<br>(%) | Atomic percent<br>(%) | Atomic percent<br>(%)            | Atomic percent<br>(%)                            | Atomic percent<br>(%)                                    | Atomic percent<br>(%)                                    |       |
| <b>P</b>              | 5.45                  | 9.14                             | 10.6                                             | 8.90                                                     | 7.10                                                     | 6.09  |
| <b>Fe</b>             | 5.38                  | 14.03                            | 16.29                                            | 12.60                                                    | 3.60                                                     | 29.94 |
| <b>Ni</b>             | 19.23                 | 76.83                            | 73.11                                            | 78.50                                                    | 89.30                                                    | 62.97 |
| <b>Zn</b>             | 69.94                 | -                                | -                                                | -                                                        | -                                                        | -     |

**Table S2.** Activity and stability of various reported NiFe-LDH and related NiFe hydroxide catalysts for OER in 1M KOH.

| OER electrocatalysts                       | $\eta_{10}(\text{mV})$ | Dur(h)     | References |
|--------------------------------------------|------------------------|------------|------------|
| <b>This work</b>                           | <b>190</b>             | <b>220</b> |            |
| NiFe LDH@defective                         | 210                    | 10         | 1          |
| NiFe LDH-rGO                               | 250                    | 9          | 2          |
| NiFe LDH@HPGG                              | 265                    | 50         | 3          |
| NiFe LDH @NGH                              | 290                    | 12         | 4          |
| NiFe LDH QD@GH                             | 220                    | 10         | 5          |
| NiFe LDH /C                                | 210                    | 28         | 6          |
| NiFeCr LDH@CP                              | 225                    | 6          | 7          |
| NiFeCe LDH-CNT                             | 227                    | 8.3        | 8          |
| S-NiCoFe LDH NA                            | 206                    | 30         | 9          |
| NiFe LDH@Cu NA                             | 199                    | 48         | 10         |
| NiFe LDH-Cu <sub>3</sub> P NA              | 235                    | 11         | 11         |
| Ni NP-NiFe LDH                             | 328                    | 18         | 12         |
| NiFe LDH@NiCoP NA                          | 220                    | 100        | 13         |
| NiFe LDH@Ni <sub>3</sub> S <sub>2</sub>    | 190                    | 40         | 14         |
| NiFe <sub>2</sub> O <sub>4</sub> /NiFe LDH | 213                    | 20         | 15         |
| NiFe LDH@Co <sub>3</sub> O <sub>4</sub>    | 269                    | 40         | 16         |
| FeOOH/NiFe LDH NA                          | 207                    | 20         | 17         |
| Fe-Ni(OH) <sub>2</sub>                     | 270                    | 40         | 18         |
| Ni/NiFe(OH) <sub>x</sub> NA                | 240                    | 38         | 19         |
| NiFe-Cu <sub>2</sub> O NA                  | 215                    | 50         | 20         |
| R-NiFeOOH                                  | 270                    | 11         | 21         |

**Table S3.** Calculation results of ZPE-TS for Gibbs free energy.

|                  | H <sub>2</sub> O | H <sub>2</sub> | sur-OH* | sur-O* | sur-OOH* |
|------------------|------------------|----------------|---------|--------|----------|
| ZPE – TS<br>(eV) | 0.084            | 0.05           | 0.34    | 0.08   | 0.28     |

**Table S4.** Thermodynamic data used in the calculations of Gibbs free energy

|                              | E(eV)      | G          |
|------------------------------|------------|------------|
| H <sub>2</sub> O             | -14.218518 | -14.134807 |
| H <sub>2</sub>               | -6.77      | -6.817005  |
| O <sub>2</sub>               | —          | -9.71559   |
| OH <sup>-</sup>              | —          | -10.726305 |
| NiFeP-O/NiOOH                | -654.77046 | -683.04    |
| NiFeP-O/NiOOH-OH*            | -664.54105 | -681.744   |
| NiFeP-O/NiOOH-O*             | -659.01612 | -679.888   |
| NiFeP-O/NiOOH-OOH*           | -669.72842 | -679.674   |
| NiOOH                        | -387.82304 | -416.093   |
| NiOOH-OH*                    | -398.54586 | -415.749   |
| NiOOH-O*                     | -392.65726 | -413.529   |
| NiOOH-OOH*                   | -402.48702 | -412.433   |
| Defective NiFeP-O/NiOOH      | -618.90051 | -647.170   |
| Defective NiFeP-O/NiOOH-OH*  | -623.47677 | -646.036   |
| Defective NiFeP-O/NiOOH-O*   | -633.96012 | -644.349   |
| Defective NiFeP-O/NiOOH-OOH* | -628.83232 | -643.906   |

**References**

1. Y. Jia, L. Zhang, G. Gao, H. Chen, B. Wang, J. Zhou, M. T. Soo, M. Hong, X. Yan, G. Qian, J. Zou, A. Du and X. Yao, *Adv. Mater.*, 2017, **29**, 1700017.
2. T. Zhan, Y. Zhang, X. Liu, S. Lu and W. Hou, *J. Power Sources*, 2016, **333**, 53-60.
3. Y. Ni, L. Yao, Y. Wang, B. Liu, M. Cao and C. Hu, *Nanoscale*, 2017, **9**, 11596-11604.
4. R. Li, J. Xu, J. Ba, Y. Li, C. Liang and T. Tang, *Int. J. Hydrogen Energy*, 2018, **43**, 7956-7963.
5. J. Guo, X. Li, Y. Sun, Q. Liu, Z. Quan and X. Zhang, *J. Solid State Chem.*, 2018, **262**, 181-185.
6. S. Yin, W. Tu, Y. Sheng, Y. Du, M. Kraft, A. Borgna and R. Xu, *Adv. Mater.*, 2018, **30**, 1705106.
7. Y. Yang, L. Dang, M. J. Shearer, H. Sheng, W. Li, J. Chen, P. Xiao, Y. Zhang, R. J. Hamers and S. Jin, *Advanced Energy Materials*, 2018, **8**, 1703189.
8. H. Xu, B. Wang, C. Shan, P. Xi, W. Liu and Y. Tang, *ACS Applied Materials & Interfaces*, 2018, **10**, 6336-6345.
9. L.-M. Cao, J.-W. Wang, D.-C. Zhong and T.-B. Lu, *Journal of Materials Chemistry A*, 2018, **6**, 3224-3230.
10. L. Yu, H. Zhou, J. Sun, F. Qin, F. Yu, J. Bao, Y. Yu, S. Chen and Z. Ren, *Energy & Environmental Science*, 2017, **10**, 1820-1827.
11. P. Zhao, H. Nie, Z. Zhou, J. Wang and G. Cheng, *ChemistrySelect*, 2018, **3**, 8064-8069.
12. X. Gao, X. Long, H. Yu, X. Pan and Z. Yi, *J. Electrochem. Soc.*, 2017, **164**, H307.
13. H. Zhang, X. Li, A. Hähnel, V. Naumann, C. Lin, S. Azimi, S. L. Schweizer, A. W. Maijenburg and R. B. Wehrspohn, *Adv. Funct. Mater.*, 2018, **28**, 1706847.
14. G. Zhang, J. Yuan, Y. Liu, W. Lu, N. Fu, W. Li and H. Huang, *Journal of Materials Chemistry A*, 2018, **6**, 10253-10263.
15. Z. Wu, Z. Zou, J. Huang and F. Gao, *ACS Applied Materials & Interfaces*, 2018, **10**, 26283-26292.
16. S. Wang, J. Wu, J. Yin, Q. Hu, D. Geng and L.-M. Liu, *ChemElectroChem*, 2018, **5**, 1357-1363.
17. J. Chi, H. Yu, B. Qin, L. Fu, J. Jia, B. Yi and Z. Shao, *ACS Applied Materials & Interfaces*, 2017, **9**, 464-471.
18. J.-T. Ren, G.-G. Yuan, C.-C. Weng, L. Chen and Z.-Y. Yuan, *Nanoscale*, 2018, **10**, 10620-10628.
19. S. Zhuang, L. Wang, H. Hu, Y. Tang, Y. Chen, Y. Sun, H. Mo, X. Yang, P. Wan and Z. U. H. Khan, *ChemElectroChem*, 2018, **5**, 2577-2583.
20. H. Chen, Y. Gao and L. Sun, *ChemSusChem*, 2017, **10**, 1475-1481.
21. M. Asnavandi, Y. Yin, Y. Li, C. Sun and C. Zhao, *ACS Energy Letters*, 2018, **3**, 1515-1520.
